# Supplementary material for: Temporal trends in outcome and patient characteristics in dilated cardiomyopathy, data from the Swedish Heart Failure Registry 2003–2015
Source: Springer Nature journal article supplement (doi:10.1186/s12872-021-02124-0), 2021-06-18

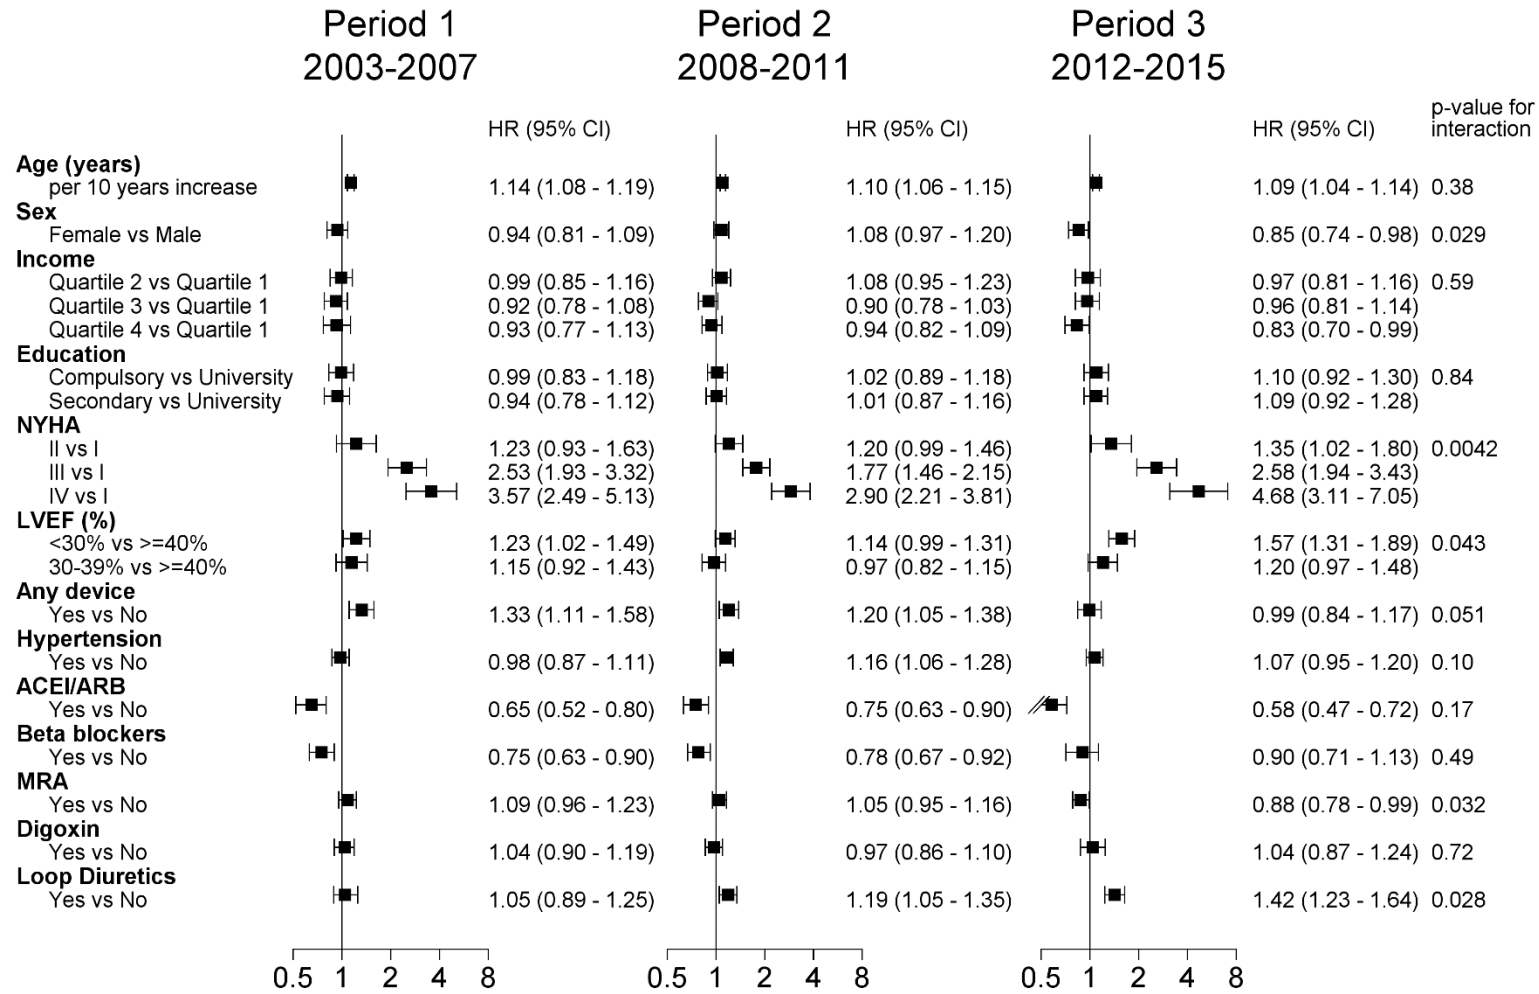

Supplement: MOESM1 [file 19273630]
